# **Production and secretion of recombinant proteins using the endotoxin-free, Gram-negative bacterium *Sphingobium japonicum***

Ehud Shahar<sup>1,2\*</sup>, Ken Emquies<sup>1,2\*</sup>, Jacob Pitcovski<sup>1,2</sup>, Itai Bloch<sup>1</sup>, Dalia Eliahu<sup>1</sup>, Ran Ben Adiva<sup>1</sup>, Itamar Yadid<sup>1,2,3</sup>.

<sup>1</sup>Migal – Galilee Research Institute Kiryat Shmona - Israel

<sup>2</sup>Tel-Hai Academic College Kiryat Shmona – Israel

<sup>3</sup>Corresponding author – itamarya@migal.org.il

\*Equal contribution

## **Abstract**

Gram-negative bacteria are common and efficient protein expression systems, yet their outer membrane endotoxins can elicit undesirable toxic effects, limiting their applicability for parenteral therapeutic applications, e.g., production of vaccine components. In the bacterial genus *Sphingomonas* from the *Alphaproteobacteria* class, lipopolysaccharide (LPS) endotoxins are replaced with non-toxic glycosphingolipids (GSL), rendering it an attractive alternative for therapeutic protein production. To explore the use of *Sphingomonas* as a safe expression system for production of proteins for therapeutic applications, in this study, *Sphingobium japonicum* (SJ) injected live into embryonated hen eggs proved safe and nontoxic. Multimeric viral polypeptides derived from Newcastle disease virus (NDV) designed for expression in SJ, yielded soluble proteins which were specifically recognized by antibodies raised against the whole virus. In addition, native signal peptides (SP) motifs identified using whole-genome computerized analysis and coupled to secreted proteins in SJ induced secretion of  $\alpha$ Amy and mCherry gene products. Relative to the same genes expressed without an SP, SP 104 increased secretion of  $\alpha$ Amy (3.7-fold) and mCherry (16.3-fold) proteins and yielded accumulation of up to 80 $\mu$ g/L of the later in the culture medium. Taken together, the presented findings demonstrate the potential of this unique LPS-free Gram-negative bacterial family to serve as an important tool for protein expression for both research and biotechnological purposes, including for the development of novel vaccines.

**Importance:** The Gram-negative, LPS-free *Sphingomonas* genus can serve as an effective and safe platform for therapeutic protein expression and secretion and bears potential as a live bacteria delivery system for protein vaccines.

## **Keywords:**

*Sphingomonas*, Recombinant subunit vaccine, Lipopolysaccharide-free, Glycosphingolipids, Signal peptides

## Background

*E. coli* is the main bacterial species used for protein expression for research, industrial and pharmaceutical applications. The comprehensive data available regarding its genetic and physiological characteristics offer an abundance of tools together with well-established work protocols. These call for use of readily available, simple and inexpensive media, and enable genetic manipulation, rapid propagation and high target protein yields (Schmidt 2004; Rosano and Ceccarelli 2014; Zhang et al. 2018). Despite the said advantages, protein expression in *E. coli* can generate misfolded proteins that lack both activity and conformational epitopes required to produce neutralizing antibodies in vaccines. Improper folding in a prokaryote-based system can also result in the accumulation of inclusion bodies (IB) or no expression at all. Moreover, sample contamination with the highly toxic *E. coli* lipopolysaccharide (LPS) requires a critical purification step (Petsch and Anspach 2000; Kawahara et al. 1999; Alexander and Rietschel 2004).

The *Sphingomonadaceae* family is a unique Gram-negative bacteria, best known for its ability to degrade a wide variety of man-made pollutants including dioxin, biphenyl, bisphenol, and pentachlorophenol (Ederer et al. 1997; Prakash and Lal 2006), and to produce complex biopolymers, namely gellan gum and additional related polysaccharides (Krziwon et al. 1995). While molecular tools for genetic manipulation of and protein overexpression in this family are still limited, a growing number of studies is being conducted to further establish and expand *Sphingomonadaceae* applications in biotechnology (Heaver et al. 2018; Lin et al. 2021).

In contrast to other Gram negative bacteria, members of the *Sphingomonadaceae* family do not generate LPS, but rather, produce the much less immunogenic molecule - glycosphingolipids (GSL), which structurally and physicochemically resembles the lipid A component of LPS (Kawahara et al. 1999). The biological role of GSL is still not fully understood and is being actively researched (Olsen and Jantzen 2001). Studies have shown that some GSLs induce immunological activity 10,000-fold lower compared to LPS whereas others are entirely inactive, with no immunotoxic effects (Krziwon et al. 1995). In addition, *Sphingomonadaceae* bacteria do not regularly colonize or invade tissues and are rarely associated with infectious diseases despite their widespread existence in the environment (Arora and Porcelli 2008). Furthermore, as a result of LPS replacement by GSL, which form unique membrane properties, their ability to fold and secrete challenging proteins might be improved. Considering these characteristics, *Sphingomonadaceae* may offer an attractive bacterial platform for protein expression and production.

The current study evaluated the potential of *Sphingobium japonicum* (SJ), a member of the *Sphingomonas* family, to serve as a live protein delivery vector, and to produce and secrete polypeptides aimed for therapeutics and vaccination.

## Materials and Methods

### Toxicity evaluation following *in-ovo* injection of bacteria

*E. coli* strain BL21 (DE3) and *S. japonicum* UT26 (NBRC 101211) were grown to  $OD_{600}=1$ , which is equivalent to  $5 \times 10^8$  cells/ml. *E. coli*, *S. japonicum* or PBS as control, were injected (100 $\mu$ l) into the allantoic fluid of embryonated specific pathogen-free eggs (Charles River, Wilmington, MA) preincubated for 18 days (37 °C, ~80% relative humidity and gentle rocking) (Fig. 1). Eggs were further incubated, and hatching percentage was determined on day 21, i.e., 3 days after injection). The hatched chicks were monitored for an additional 14 days and inspected for signs of morbidity.

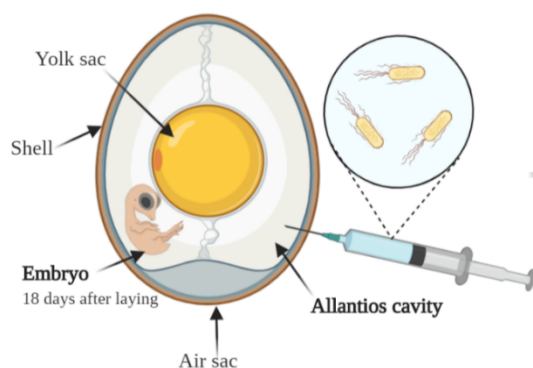

**Figure 1. Effect of *in-ovo* bacterial injection on embryonated hen egg hatching rate.** To assess the potential immunological advantage of SJ to serve as a vector and expression system, live bacteria were injected into hen eggs. The bacterial cells were suspended in PBS and 0.1 ml of cultures of similar optical densities ( $OD_{600}=1$ ) were injected into the allantois cavity on Day 18 of incubation (n is indicated above each treatment bar). PBS: control group, *E. coli*: BL21 (DE3) strain, *S. japonicum*: SJ wild type. Illustration was drawn using BioRender.

### Native signal peptide selection

The genome sequence of *S. japonicum* UT26 was from NCBI GenBank AP010803-6 (Nagata et al. 2010). All open reading frames (ORFs) in the genome were defined via NCBI ORFinder and translated into amino acid sequences. All sequences were submitted to the SignalP 5.0 server for prediction of Sec secretory signal peptides (SPs) (Emanuelsson et al. 2007). Out of the 200 top-scoring SP sequences, six representatives (SP1, SP2, SP5, SP99, SP104 and SP199) were selected for further analysis (Table 1).

### Identification of proteins naturally secreted to the medium by *S. japonicum*

To identify the proteins secreted into the medium, cells were pelleted, the supernatant was collected and filtered and then subjected to TCA precipitation, as previously described (Sanchez 2001). The precipitate was dried by incubation at 95 °C for 10 min, resuspended in 100  $\mu$ l 1X sample buffer

containing beta-mercaptoethanol and then heated for 5 min at 95 °C. Samples were analyzed by mass spectrometry (MS) at the Smoler Proteomics Center at the Technion Institute, Haifa, Israel.

## Plasmid construction

The  $\alpha$  amylase ( $\alpha$ Amy) gene was amplified from the genomic DNA of *B. licheniformis* (NBRC 12200) using the following primers: forward 5'-CTAGTAGAGGAAGCTTCCGCATGCTCGAGGCAAATCTTAAAGGGACGCTG-3', reverse-5'-GTAGTCCGGATCCCAATTGGAGCTCCTATCTTTGAACATAAATTGAAACCGAC-3'.

The  $\alpha$ Amy gene was cloned into pVH plasmid vector (Kaczmarczyk et al. 2014) using a restriction-free (RF) cloning technique, according to a previously published protocol (Van Den Ent and Löwe 2006). The mCherry gene in the plasmid pVCC was obtained from Addgene (Kaczmarczyk et al. 2014), and digested with XhoI and EcoRI and cloned into pVH digested with the same enzymes.

All SP sequences were synthesized by Genscript® and inserted into the expression vectors via restriction with HindIII and XhoI (Thermo Scientific™ FastDigest) followed by ligation (Fig. 2).

To preserve the proteolytic cleavage site, the native 5 amino acids (AA) downstream to the SP sequence were included (Auclair et al. 2012). *E. coli* DH5 $\alpha$  (ATCC 53868) was used for all plasmid amplifications.

## SJ transformation

SJ colonies were grown in 5 ml four-fold diluted tryptic soy broth (1/4 TSB) medium overnight (30 °C, 250 rpm) and then transferred to 45 ml fresh 1/4 TSB and grown until O.D<sub>600nm</sub>=0.6. The cells were pelleted, rinsed with water, and then suspended in 1 ml 300 mM sucrose solution (dissolved in double distilled water (DDW)). Then, 0.25-1  $\mu$ g plasmid was added to 100  $\mu$ l competent cells and incubated on ice for 5 min. The mixture was transferred to a pre-chilled 2 mm gap electroporator cuvette and cells were electroporated using the EC2 program (MicroPulser, Bio-Rad). Cells were then suspended in 3 ml 1/4 TSB (at room temperature, rt) supplemented with 0.2 % glucose and grown (30 °C, 250 rpm) overnight. Cells (100  $\mu$ l) were then seeded on selective plates containing 1/4 TSB agar supplemented with 12.5  $\mu$ g/ml tetracycline, 10  $\mu$ g/ml piperacillin, and 0.2% glucose and further incubated for 2-3 days, at 30 °C. Plasmid presence in forming colonies was verified by polymerase chain reaction (PCR).

## Protein expression in SJ

Individual PCR-verified colonies were incubated overnight (30 °C, 250 rpm) in 10 ml selective 1/4 TSB medium supplemented with 12.5  $\mu$ g/ml tetracycline, 10  $\mu$ g/ml piperacillin, and 0.2% glucose.

Cultures were diluted 25-fold into fresh selective medium and incubated until O.D<sub>600</sub> reached 0.8-1. Protein expression was then induced by incubating cells for 3-4 h, at 30 °C, in the presence of 250 µM vanillate.

### Alpha-amylase activity assays

To test the ability of the predicted SPs to induce the secretion of αAmy on solid medium, α amylase activity was evaluated in a Petri dish. Three colonies from each clones bearing a SP-αAmy construct were grown in 1 ml of selective medium until O.D<sub>600</sub> reached 0.6. Then, 10 µl of each culture were spotted in triplicates on selective agar plates supplemented with 0.2 % soluble starch and 250 µM vanillate and incubated overnight at 30 °C. Starch hydrolysis was visualized and evaluated after staining the plate with KI/I<sub>2</sub> solution for 10 min at room temperature.

αAmy secreted into liquid medium was assayed by gel zymography. Growth medium (10 ml) from each clone carrying a SP-αAmy construct was collected and concentrated four-fold. The samples were mixed with nonreducing sample buffer and loaded onto 10% SDS PAGE gel containing 0.2% soluble starch. Purified *B. licheniformis* αAmy (1 mg/ml) was loaded as a positive control. The gel was then placed in a renaturing buffer (1% Triton x-100) for 10 min, with gentle agitation, and rinsed five times in DDW. The gel was then incubated in activity buffer (50 mM Tris-HCl pH 7 and 1 mM CaCl<sub>2</sub>) for 3 h, at room temperature, on an orbital shaker. Finally, the gel was stained with KI/I<sub>2</sub> solution until the appearance of clear bands.

To quantify the ability of the various SPs to induced secretion of αAmy protein in liquid medium, four colonies for each SP were grown overnight in 2 ml selective medium and then centrifuged at 3,000 rpm, 4°C for 10 min. The cells were resuspended in 10 ml LB supplemented with 12.5 µg/ml tetracycline, 10 µg/ml piperacillin and incubated (30 °C, 250 rpm) until O.D<sub>600</sub> reached 0.6. Thereafter, vanillate was added (to 250 µM) and cells were further incubated for 4 h, and then centrifuged at 3,500 rpm for 15 min, at 4°C. To measure α-amylase activity 50 µl of the supernatant was mixed with 50 µl starch solution (20 mM sodium phosphate pH 6.9, 6.7 mM NaCl, 0.2 % soluble starch, and 1 mM CaCl<sub>2</sub>) and incubated for 2 h, at 55 °C. Then, samples were mixed with 100 µl 3,5-dinitrosalicylic acid (DNS) and incubated at 95 °C for 5 min before the absorbance was measured at 540 nm using a microplate spectrophotometer (BioTek HT).

### Quantification of mCherry secretion

SJ colonies carrying an expression plasmid with the various SPs followed by the mCherry gene were grown in 10 ml selection medium to an O.D<sub>600</sub> of 0.8. Expression was induced as described above for

$\alpha$ Amy. Then, the cells were centrifuged at 3500 rpm for 15 min at 4 °C and the medium was collected and concentrated four-fold. Protein concentration in the growth medium was quantified by measuring fluorescence at 610 nm following excitation at 575 nm in comparison of signals with a calibration curve prepared from mCherry which was cloned into pQE30 (NEB), expressed in *E. coli* DH5 $\alpha$  and purified using zinc affinity chromatography.

### **Cloning of Newcastle disease virus (NDV)-derived polypeptides**

The NDV envelop proteins hemagglutinin-neuraminidase Uniprot-P35743 (HN) and the fusion protein Uniprot-P33614 (F) from the LaSota strain were used to design the expression constructs together with the available protein structures (PDB 1G5G and 4FZH respectively (Chen et al. 2001; Yuan et al. 2012)). The genes for the designed HN protein variant 1 (HNv1) and F protein variant 1 (Fv1) were codon-optimized for expression in SJ and synthesized by Genscript®. The genes with or without SP 104 were cloned into the pVH plasmid as described above, using HindIII and XhoI restriction enzymes.

### **Detection of expressed NDV polypeptides by western blot (WB) analysis**

Following the induction of NDV polypeptide expression in SJ, cells were separated from the growth medium by centrifugation, then lysed by sonication and centrifuged at 10,000 g at 4 °C. Lysate pellet and lysate supernatant were loaded onto SDS-PAGE gels and assayed by western blotting as follows. SDS-PAGE gels were washed twice in 30 ml DDW for 5 min, and proteins were then transferred to a nitrocellulose membrane using a Trans-Blot Turbo Nitrocellulose Transfer Pack and Transfer System (Bio-Rad). The membrane was blocked for 1 h with 5% skim milk in PBS supplemented with 0.05% Tween 20 (PBS-T) and then incubated for 1 h with rabbit anti polyhistidine-HRP or chicken serums (1:200), followed by 1 h incubation with goat anti-chicken IgY-HRP (Thermo Scientific). The membrane was washed three times for 5 min with PBS-T buffer after each incubation. Finally, the membrane was placed in 500  $\mu$ l of Clarity Western ECL Blotting Substrate and Enhancer (Bio-Rad) and chemiluminescence was detected using an ImageQuant™ LAS 4000.

### **Chicken vaccination with HNv1 expressed in SJ**

Cell pellets from 50 ml cultures of induced HNv1-expressing SJ cells were resuspended in 5 ml PBS and lysed by sonication. Cell lysates (1.75 ml) were then diluted 2-fold in PBS and mixed with 3.5 ml complete Freund's adjuvant or incomplete Freund's adjuvant for the first and second vaccine doses,



respectively (Thermo Scientific). Adjuvanted PBS was prepared as a negative control, and commercial inactivated viral vaccine (VH, Phibro™) was used as a positive control. Chickens were maintained on a 24 °C, 12:12 light:dark regimen and food ad lib. Two vaccine doses (1 ml) were injected half subcutaneously and half intramuscularly, with the first dose administered at 3 weeks of age and the second 2 weeks later. Blood was drawn from the jugular vein 2 weeks after the last injection. Sera were extracted and stored at -20 °C until use.

### **Enzyme-linked immunosorbent assay (ELISA)**

Sandwich ELISA was performed with mouse anti-NDV-HN antibodies (OriGene) diluted 1:100 in PBS for 1 h to capture whole attenuated NDV (VH, Phibro™). The plate was blocked (1 h, room temperature) with 300 µl PBS-T supplemented with 5% skim milk. Following NDV capture for 1h at RT and PBS wash, serum was added and then detected with goat anti-chicken IgY-HRP (Thermo Scientific). Plates were then incubated with TMB substrate solution (Thermo Scientific), and reaction was terminated by addition of sulfuric acid. The absorbance was measured at 450 nm using a microplate spectrophotometer (BioTek HT).

### **Statistical analysis and illustrations design**

Statistical analysis and graph design were performed using GraphPad Prism version 9 (GraphPad Software Inc, USA). ANOVA test with Tukey post hoc analysis was performed to determine significant differences between groups. Illustrations were designed using the BioRender website version.

## **Results**

### **Toxicity of SJ in embryonated eggs**

To evaluate the potential toxic effect of LPS-free *SJ*, the allantois cavity of fertilized hen eggs (n=6) was injected with an equal amount of SJ or *E. coli* BL21 cells, which served as an LPS-positive control. The injection was performed on day 18 (out of 21) of egg incubation, when the embryo's adaptive immune system is functional, and eggs are routinely transferred from an incubator to a hatcher (Alqhtani et al. 2022). Following *in ovo* administration of *E. coli*, 0/6 chicks hatched, whereas all chicks injected with SJ hatched after 21 days and survived for at least two weeks, with no apparent side effects or abnormal signs. Similar hatching rates were noted in the group injected with PBS.

## Identification, design, and cloning of native secretion signal peptides

To identify potential signal peptides (SPs), the genome of SJ was screened for protein sequences containing SP motifs. Out of the first 200 predicted native SPs, six were selected for additional characterization following validation of presence of a putative secreted protein sequence downstream (Table 1).

In addition, MS analysis of proteins secreted following growth of SJ in rich medium identified over 300 proteins. Out of the 6 selected SP sequences, only SP 2 and SP 5 which drives the secretion of alkaline phosphatase and the M1 family protease respectively, were detected in culture medium by the MS analysis (Table 1). To evaluate the ability of the six selected SP sequences to drive the secretion of model proteins, the SP sequences were inserted into a pVH expression vector carrying the  $\alpha$  Amy and mCherry reporter genes (Figure 2). All but one SP construct (SP 99) yielded positive colonies. Thus, all further experiments were carried out using the remaining five SPs (Table 1).

**Table 1. The predicted native signal peptides obtained from server SignalP**

| Signal peptide | SignalP score | Accession#     | Length (AA) | Function                          | Presence in media | AA sequence                 | Additional 5 AA |
|----------------|---------------|----------------|-------------|-----------------------------------|-------------------|-----------------------------|-----------------|
| SP 1           | 0.937         | WP_013053914.1 | 22          | SGNH/GDSL hydrolase               | -                 | MRLTLAAFLPLAACVATPAWA       | ASCPV           |
| SP 2           | 0.933         | WP_013040766.1 | 19          | alkaline phosphatase              | +                 | MLKNVAAALLLAASLPAMA         | QGPVQ           |
| SP 5           | 0.925         | WP_013039216.1 | 24          | M1 family peptidase               | +                 | MSFSKILPLMLAAAPLAMAMPALA    | QTAAA           |
| SP 99          | 0.840         | WP_013053986.1 | 22          | TonB-dependent receptor           | -                 | MRNNRLLLAGVGLMSLVQAAHA      | QDAAA           |
| SP 104         | 0.838         | WP_049775278.1 | 27          | conjugal transfer protein TraH    | -                 | MSRLSRLSISLIADVAAACGTTVPAHA | QSWAE           |
| SP 199         | 0.771         | WP_013054001.1 | 22          | ABC transporter substrate-binding | -                 | MAKNRGAIVAVALVAAAGFGLA      | AAKFG           |

**SignalP Score:** Discrimination score obtained from server SignalP, correlating to the probability of correct signal peptide prediction (version 4.1).

**AA:** amino acid

**MS:** native protein detected in medium by mass spectrometry (yes + / no -)

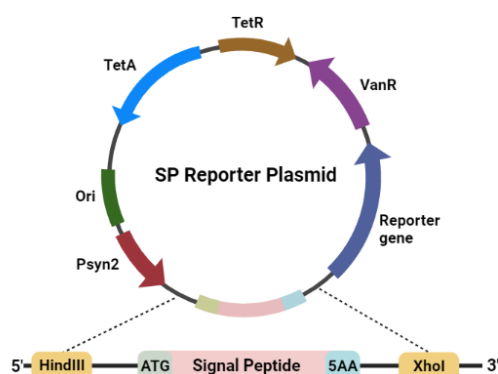

**Figure 2. Signal peptide reporter plasmid map and signal peptide integration.** The signal peptide (SP) sequence was designed for insertion into a pVH expression vector. Restriction sites HindIII and XhoI were inserted at the 5' and 3' ends, respectively. ATG: start codon, 5AA: five amino acids downstream to the SP of the original gene.

## Influence of addition of SP sequence on the secretion of $\alpha$ Amy and mCherry model proteins



The ability of the predicted SPs to drive secretion of active  $\alpha$ Amy was examined by growing colonies transformed with a vector carrying different SP sequences upstream to the  $\alpha$ Amy gene on plates supplemented with starch. SP 2, SP 5, and SP 104 were associated with strong  $\alpha$  amylase activity, evident by the formation of large yellow/orange halos around all colonies tested, while  $\alpha$ Amy cloned with SP 1 and SP 199 were associated with a relatively weak or practically undetectable signal, respectively (Figure 3A).

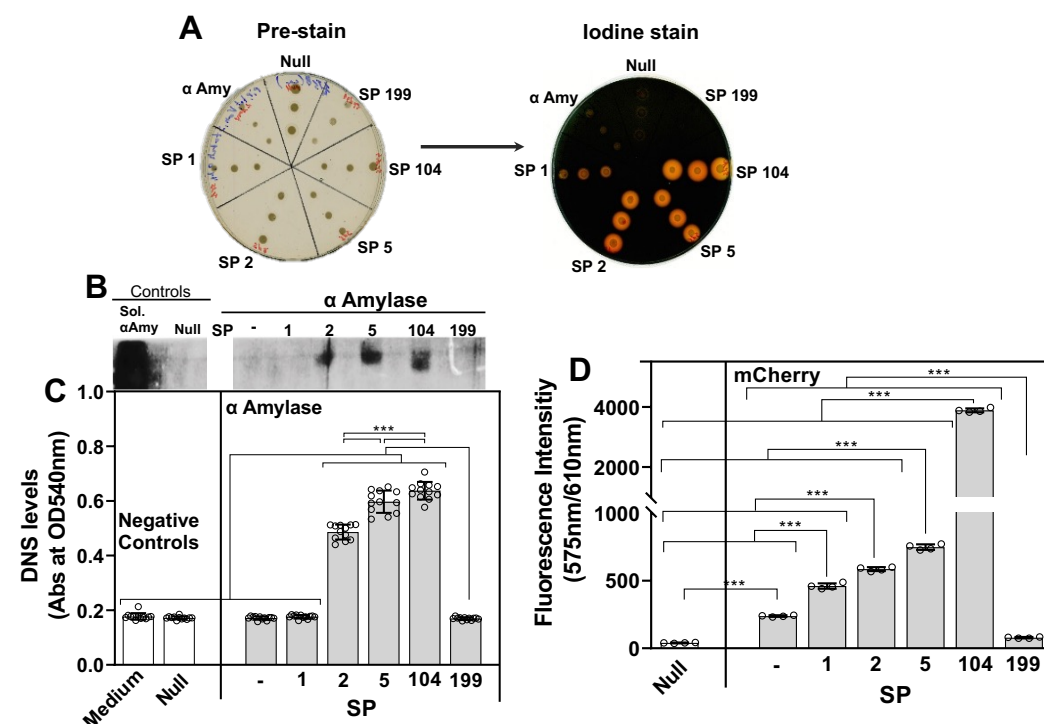

**Figure 3. The influence of signal peptides on protein secretion in *Sphingobium japonicum*.** **A.** Secretion of  $\alpha$ -Amy was tested in solid medium. Three colonies from each SJ transformed with a pVH vector expressing either signal peptide (SP) 1, SP 2, SP 5, SP 104, SP 199, Null (pVH empty vector) or  $\alpha$ Amy (pVH vector with  $\alpha$ -amylase without addition of SP) were grown on 0.2% starch Petri dishes (left). Iodine stain solution was added to detect starch hydrolysis (right). Secretion of  $\alpha$ Amy (B, C) and mCherry (D) into liquid medium was tested and the activity quantified by using growth medium collected from SJ cells carrying empty pVH vector as negative control (Null) and growth medium collected from SJ cells carrying the  $\alpha$ Amy gene without (-) or with SP 1, SP 2, SP 5, SP 104, or SP 199. **B.** Negative image visualization of gel zymography of purified  $\alpha$ Amy sample as positive control (Sol.  $\alpha$ Amy). **C.** Mean  $\pm$  SD (n=12)  $\alpha$  amylase activity as measured by starch degradation into reducing sugars, tested using the 3,5-dinitrosalicylic acid (DNS) assay. **D.** Mean  $\pm$  SD (n=4) mCherry fluorescence intensity (575nm/610nm) measured in growth medium. One-way ANOVA with Tukey's post hoc was applied to determine statistically significant differences (\*\*\*)  $p \leq 0.001$ .

Quantification of  $\alpha$ Amy and mCherry secretion in liquid medium following induction found similar results as observed in solid medium, with high  $\alpha$  amylase activity in samples bearing SP 2, SP 5, and SP 104 (Figure 3B). No activity was observed in proteins linked to SP 1, SP 199 or lacking a SP altogether. Further quantification of the secreted  $\alpha$  amylase activity using the DNS assay found the highest enzymatic activity in the medium when  $\alpha$ Amy secretion was driven by SP 104, with 3.7-fold higher levels compared to samples with no SP ( $p < 0.001$ ). Activity of  $\alpha$ Amy cloned with SP 2 and

SP 5 was also significantly higher than that measured in colonies lacking SP (2.8-fold and 3.4-fold increase, respectively; Figure 3C).

mCherry fluorescence signals followed a similar trend. SP 104-driven secretion was associated with a 16.3-fold higher fluorescence signal as compared to samples lacking a SP ( $p < 0.001$ ). SP 1, SP 2 and SP 5 also significantly increased the measured fluorescence signal as compared to mCherry secreted without addition of SP. Notably, the addition of SP 199 sequence to the mCherry gene resulted in a 3.2-fold decreased signal as compared to cells carrying the gene without a SP (Figure 3D). Under the tested conditions, SP 104, which was the most potent SP, induced secretion of 80.6 µg/L mCherry (Table 2).

**Table 2. Quantification of mCherry secreted in broth medium**

| Signal peptide | Fluorescence (a.u) | MCherry concentration (µg/ml) |
|----------------|--------------------|-------------------------------|
| SP 2           | 585.5              | 12.2                          |
| SP 5           | 748                | 15.6                          |
| SP 104         | 3885.25            | 80.6                          |

a.u.: arbitrary units.

### **Design and construction of a subunit vaccine against Newcastle Disease Virus**

Proteins sequences derived from the NDV virus, a prominent virus infecting wild and domestic birds were used as a model for heterologous protein production and to evaluate the therapeutic potential of proteins produced in SJ and for vaccination. NDV expresses fusion protein (F) and hemagglutinin neuraminidase protein (HN), two important functional surface glycoproteins which induce the production of neutralizing antibodies. The F protein is a homotrimer, synthesized as a non-fusogenic F0 proprotein and is converted to the fusogenic protein after proteolytic cleavage by a host cell protease. The mature protein consists of two disulfide-linked subunits: F1 and F2. The F protein mediates virus-cell fusion, and its cleavability is directly related to virus virulence. The HN homotetramer is composed of a short N-terminal cytoplasmic followed by trans membranar, and outer membrane stalk and head domains. It recognizes sialic acid-containing receptors on the target cell surface, promotes F protein-driven virus-cell fusion activity, and acts as a neuraminidase by removing sialic acid from progeny virus particles (Huang et al. 2004).

To express the viral proteins in SJ a structure-guided analysis was performed to select epitopes vital for recognition by the immune system together with structural motifs essential to the formation of stable proteins. The designed HN protein variant 1 (HNv1) was constructed from the head fragment of native HN (Figure 4a). The designed F protein variant 1 (Fv1) was constructed from the F2 and F1

fragments connected by their natural linker (Figure 4b). A histidine tag was added to the C-terminus region of both viral subunits, for purification and detection purposes.

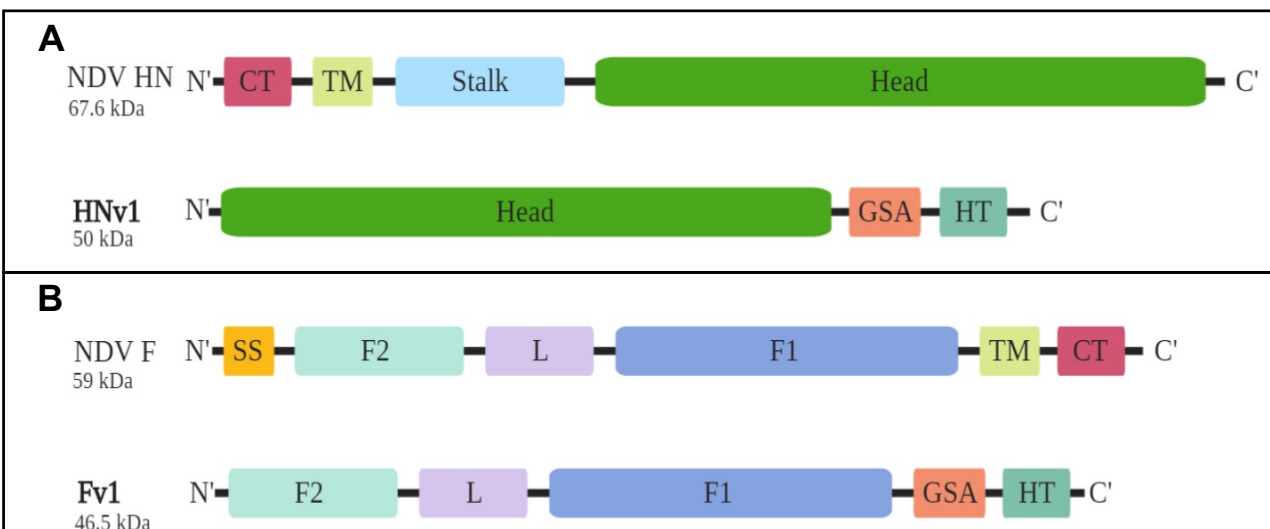

**Figure 4. Schematic illustration of the native and designed HN and F proteins.** Sequence and structural alignments were used to design NDV surface proteins suitable for expression in a prokaryotic system. **A.** Native NDV HN protein (top) and designed HNv1 polypeptide (bottom in bold). **B.** Native NDV F protein (top) and designed Fv1 polypeptide (bottom in bold). CT- cytoplasmic tail, TM- transmembrane domain, Stalk- the conjunctive segment of the tetrametric form, Head- globular fragment, GSA- link adaptor encoding for two repeats of three glycines followed by serine, HT- x6 Histidine tag, SS- signal sequence, F1/F2- segment 1 or 2 of F protein, L- linker.

The NDV protein subunits were cloned without or downstream and in-frame with SP 104. Vectors were then transformed into wild type (WT) SJ cells. The presence of SP 104 lowered the intracellular expression of Fv1 (Fv1-104) (Figure 5A). In parallel, no polypeptide secretion to the medium was detected (Figure 5B). Notably, a significant reduction in growth rate was measured after induction of Fv1-104 expression, suggesting that it may have had a toxic effect on the cell. In contrast, addition of SP 104 to HNv1 (HNv1-104) did not significantly change the intracellular expression of the target protein (Figure 5A) and induced secretion of HNv1 to the culture medium (Figure 5B). Serum collected from NDV-vaccinated chickens was able to detect HNv1 but not the Fv1 polypeptide (Figure 5C). Taken together, the expression, secretion, and immune relevance of the HNv1 polypeptide renders it a better candidate for a subunit vaccine produced in SJ, as compared to Fv1 in its present form.

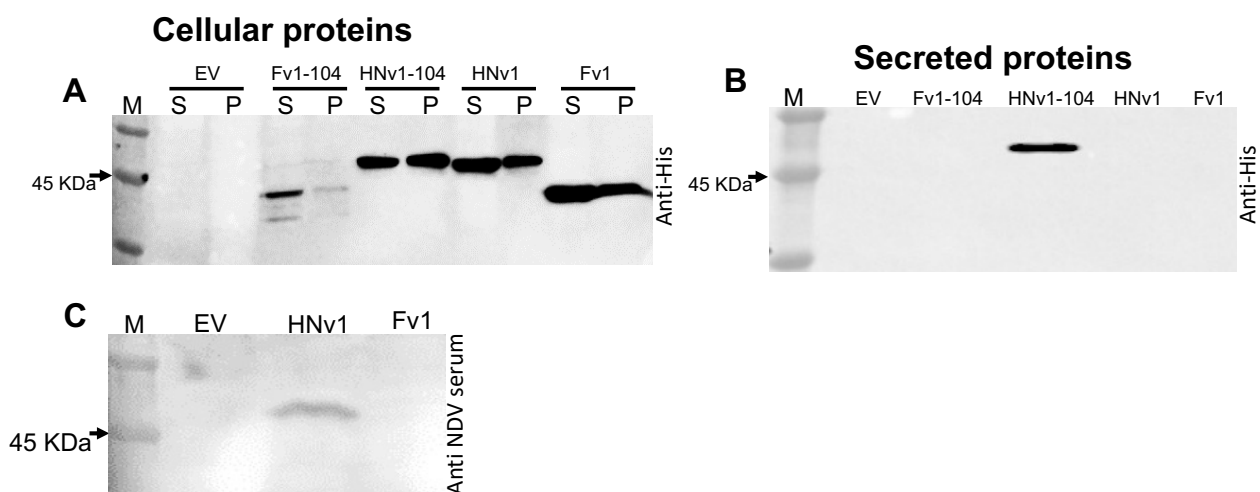

**Figure 5. Expression, secretion and immune recognition of recombinant NDV subunits.** Western blot of SJ-expressed Fv1 and HNv1 polypeptides with and without SP 104. Rabbit anti-x6 His tag-HRP or serum collected from NDV-immunized chickens and goat anti-chicken HRP were used for detection. (A) Cellular protein content after induction of both viral subunits expressed with or without SP104. S, cell lysate supernatant (soluble); P, cell lysate pellet (insoluble). (B) Detection of Fv1 and HNv1 secreted into the growth medium. (C) Proteins from the soluble cellular fraction detected with anti-NDV serum and goat anti-chicken HRP. M, protein size marker; EV, empty vector; HNv1/Fv1, the respective viral subunit; HNv1-104/Fv1-104, the respective viral subunit with the signal peptide SP 104.

### Chicken vaccination with viral subunits expressed in SJ cells

To examine the ability of HNv1 to induce a specific immune response, two doses of clarified and concentrated bacterial lysates were injected at a two-weeks interval, into three-week-old chicks. Two weeks after the second injection, sera samples from the HNv1-vaccinated group showed a small increase in NDV-specific antibodies (Figure 6) as compared to the PBS-vaccinated group, with two animals displaying antibody levels comparable to those obtained following vaccination with the commercial VH vaccine.

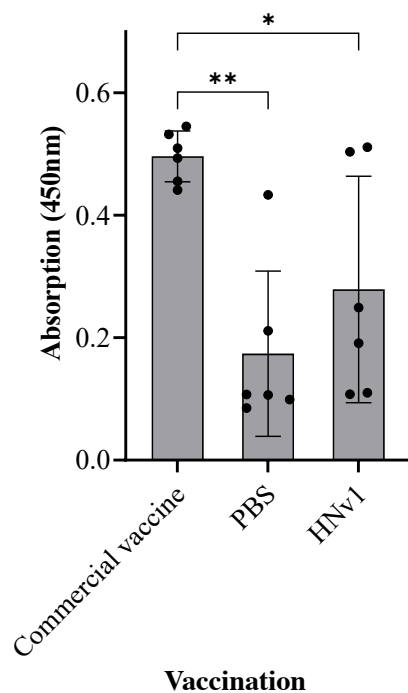

**Figure 6. Serum antibodies level against whole NDV virus.** Serum collected from chickens vaccinated with viral proteins was used in a sandwich ELISA performed as described in the material and methods. The ELISA signal is presented as mean absorption at 450 nm  $\pm$  SD (n = 6) for each group. PBS was injected as negative control, Commercial vaccine of an inactivated VH strain was injected as a positive control and HNv1 as whole cell lysate of SJ expressing the polypeptide. One-way ANOVA with Tukey's post hoc was performed, and statistically significant differences are marked with asterisks (\* $p < 0.05$ , \*\*  $p < 0.01$ ).

## Discussion

The microbial world holds an enormous degree of biological diversity of which a large fraction remains untapped due to lack of appropriate molecular tools and scientific background. Unique bacterial families may carry functional properties that can facilitate various biotechnological applications limited by the characteristics of commonly applied microorganisms. *Sphingomonadaceae*, a unique LPS-free Gram-negative bacteria, belongs to *Alphaproteobacteria*, and forms a phylogenetically diverse group of environmentally abundant bacteria that have gained some attention for their potential in bioremediation and their use in the food industry (Kaczmarczyk et al. 2013). This study explored the possibility of using SJ, a member of the *Sphingomonadaceae*, as a potential platform for production of proteins, with emphasis on therapeutic applications. SJ was chosen due to its cultivability, genome sequence availability and amenability to genetic manipulation. In addition to the use of bacteria as a platform for production of therapeutic proteins, their use as a vehicle for delivery of relevant therapeutics, e.g., vaccine antigens, may also offer many advantages over traditional administration routes. Bacteria can be engineered to display or secrete target antigens

378 and can be administered as a live vaccine to stimulate the host immune system (da Silva et al. 2014;  
379 Finn and Egan 2018; Szatraj et al. 2017). Although the live bacterial vaccine vector is a powerful  
380 adjuvant, certain disadvantages, such as safety and toxicity, must also be considered (Ding et al.  
381 2018).

382 Bacteria commonly used to deliver antigens are genetically modified such that most of their  
383 pathogenic components are removed. Yet, the immunogenic LPS is toxic for embryos, restricting the  
384 usage of Gram-negative bacteria. An attractive and developing route of vaccine administration in the  
385 poultry industry is *in-ovo* vaccination, where vaccine antigens are injected to embryonated eggs prior  
386 to hatching. This method facilitates automated vaccination in the hatcheries, which reduces the need  
387 for extensive manual labor and stress to the birds (Saeed et al. 2019). Injection of live SJ *in ovo*  
388 proved safe, eliciting no signs of toxicity, in contrast to LPS-producing bacteria in which all embryos  
389 died, highlighting its potential use as a live vaccine vector. Several vaccine agents have already been  
390 shown to induce an immune response following *in ovo* administration. Nevertheless, commercial *in-*  
391 *ovo* vaccination is still limited to few attenuated viral vaccines (Saeed et al. 2019).

392 The effectiveness of subunit vaccines for a number of disease-causing viruses has been shown in  
393 humans and animals, including chickens (McAleer et al. 1984; Fingerut et al. 2003; Pitcovski et al.  
394 2003; Pitcovski et al. 2005; Goldenberg et al. 2016). When compared to conventional vaccines,  
395 subunit vaccines bear no risk of incomplete inactivation or reversal to virulence as experienced with  
396 inactivated and attenuated vaccines, respectively. In addition, they are manufactured in safe-to-handle  
397 expression systems which can be relatively quickly adjusted to address emerging variants.  
398 Furthermore, the immune response is directed to the epitopes that confer protective immunity,  
399 whereas vaccination with intact viruses can induce high titers of non-neutralizing antibodies.

400 Polypeptides derived from NDV were used here as a model to evaluate the ability of SJ to express de  
401 novo designed polypeptides designed for subunit vaccination. NDV envelop proteins, including F  
402 and HN are difficult to express and produce at high quantities. Several studies had been conducted to  
403 produce these proteins in various heterologous systems, such as mammalian cell culture, plant-based  
404 systems, insect cells, yeast, virus-vector and *E. coli* (Taylor et al. 1990; Nallaiyan et al. 2010; Gu et  
405 al. 2011; Iram et al. 2014; Shahriari et al. 2015; Shahriari et al. 2016). While promising results have  
406 been reported, a cost-effective and scalable system that produces natively folded and  
407 immunogenically functional proteins is still lacking, limiting their extensive application. For a  
408 subunit viral vaccine to be functional, it is fundamental that the protein produced by the selected  
409 expression system retains its neutralizing epitopes, to induce an immune reaction to conformational  
410 epitopes which will subsequently improve virus neutralization (Khow and Suntrarachun 2012). To  
411 produce the F and HN subunits in a prokaryote-based system, codon-optimized constructs were



412 designed based on the sequence of the proteins predicted to preserve most neutralizing epitopes for  
 413 antibodies, while complex and hydrophobic segments were removed to ensure folding and prevent  
 414 aggregation (Figure 4). Soluble forms of NDV-derived subunits were detected in low quantities in  
 415 the cell lysate supernatant (Figure 5). In contrast, when expressed in *E. coli* BL21 (DE3), only  
 416 insoluble proteins which accumulated in inclusion bodies were detected. The soluble subunit formed  
 417 suggests that the SJ system facilitated correct folding of these complexed proteins. Furthermore,  
 418 serum from chicken immunized with attenuated NDV, recognized SJ-expressed HNv1 (Figure 5c),  
 419 suggesting that immunological epitopes were preserved. Additionally, immunization of chickens with  
 420 lysate from cells of SJ expressing HNv1 induced a specific immune reaction that manifested in an  
 421 overall increase in anti-viral antibody titers.

422 When expressed with SP 104, Fv1 was not secreted to the culture medium and a reduction in cell  
 423 growth rate was noted. In contrast, addition of SP 104 to the protein subunit derived from the NH  
 424 protein (HNv1-104) induced its secretion to the culture medium. These results indicate that SJ can  
 425 both produce soluble and functional NDV-derived subunits and secrete them to the culture medium,  
 426 albeit, in low quantities with the SP tested. Future testing of additional SPs and promoters is needed  
 427 to further improve secretion and production of these polypeptides.

428 Despite the interest in many different physiological aspects of *Sphingomonadaceae*, tools for protein  
 429 expression are still limited (Zhang et al. 2018). To expand the set of molecular tools available for  
 430 protein expression in *Sphingomonadaceae*, this work developed a secretion system based on SP  
 431 native to SJ. While the secretion capabilities of Gram-negative bacteria are not considered high  
 432 (Burdette et al. 2018), it was theorized that *Sphingomonadaceae* have superior secretion competence  
 433 compared to *E. coli* since they utilize a wide range of external compounds that require the secretion  
 434 of a variety of enzymes (Byun and Blinkovsky 2013). The SecYEG complex is a conserved  
 435 membrane-integrated heterotrimeric translocation channel (Saunders et al. 2006; Natale et al. 2008;  
 436 Green and Mecsas 2016), responsible for most bacterial protein translocation to the periplasmic space  
 437 of Gram-negative bacteria. This conserved complex can be found in several *Alphaproteobacteria*  
 438 species, where it was shown to function as it does in other bacteria (Gatsos et al. 2008). SecYEG in  
 439 the SJ proved 53% identical to that of the *E. coli* K 12 strain, suggesting that SJ indeed has a Sec  
 440 pathway. In addition, genes encoding proteins coupled with SP potentially secreted via Sec system  
 441 were identified and 6 putative SPs were tested for their ability to induce secretion of foreign proteins.  
 442 The 6 SP tested imparted markedly different effects on secretion of foreign proteins by SJ. The  
 443 secretion capability and efficiency of a protein carrying SP can vary dramatically, depending on the  
 444 specific gene and the growth conditions. For these reasons, a secretion reporter system was designed,  
 445 based on the pVH vector using two reporter genes. SP 2, SP 5, and SP 104 promoted protein secretion

446 levels and while all three were associated with comparable  $\alpha$ Amy secretion, SP 104 markedly  
 447 increased mCherry secretion in comparison to the other SPs (Figure 3). These results highlighted that  
 448 SP potency is greatly dependent on the downstream gene and on the expression conditions. Therefore,  
 449 the selection of a SP sequence suited for a broad range of genes and conditions is important for  
 450 development of an efficient secreted protein expression system.

451 To conclude, exploitation of LPS-free *Sphingomonadaceae* bacteria offers a significant advantage  
 452 over conventional gram-negative bacteria expression system. This bacterial expression system  
 453 successfully produced and secreted soluble complex proteins, including virus-derived vaccine  
 454 polypeptides.

455

## 456 Author Contribution.

457 KE and IY conceived and designed research. KE, RBA, DE and ES conducted experiments. IB  
458 designed DNA constructs and contributed analytical tools. KE, ES, JP and IY analyzed data. KE, ES,  
459 JP and IY wrote the manuscript.

460

## 461 Acknowledgement

462 This work was partly funded by a grant from the Chief Scientist of the Israeli Ministry of Agriculture.  
463

## 464 Ethics approvals and consent to participate

465 Animal care and ethics are in accordance with approval 020b979750 given by the ethics committee  
466 of the Kimron Veterinary Institute of Israel.

467

## 468 Competing interests

469 Authors declares they have no competing interests

470

471

472

## 473 References

474 Alqhtani AH, Fatemi SA, Elliott KEC, Branton SL, Evans JD, Leigh SA, Gerard PD, Peebles ED  
475 (2022) Effects of the In Ovo Vaccination of the ts-11 Strain of *Mycoplasma gallisepticum* in  
476 Layer Embryos and Posthatch Chicks. *Animals* 12:1120. doi: 10.3390/ani12091120

477 Arora P, Porcelli SA (2008) A Glycan Shield for Bacterial Sphingolipids. *Chem Biol* 15:642–644.  
478 doi: 10.1016/j.chembiol.2008.07.001

479 Brundage L, Fimmel CJ, Mizushima S, Wickner W (1992) SecY, SecE, and band 1 form the  
480 membrane-embedded domain of *Escherichia coli* preprotein translocase. *J Biol Chem*  
481 267:4166–4170. doi: 10.1016/s0021-9258(19)50643-3

482 Brundage L, Hendrick JP, Schiebel E, Driessen AJM, Wickner W (1990) The purified *E. coli* integral  
483 membrane protein SecY E is sufficient for reconstitution of SecA-dependent precursor protein  
484 translocation. *Cell* 62:649–657. doi: 10.1016/0092-8674(90)90111-Q

485 Burdette LA, Leach SA, Wong HT, Tullman-Ercek D (2018) Developing Gram-negative bacteria for  
486 the secretion of heterologous proteins. *Microb Cell Fact* 17:196. doi: 10.1186/s12934-018-1041-  
487 5

488 Byun T, Blinkovsky A (2013) Glycyl Amino peptidase (*Sphingomonas*). In: *Handbook of Proteolytic*  
489 *Enzymes*.

490 Chen L, Gorman JJ, McKimm-Breschkin J, Lawrence LJ, Tulloch PA, Smith BJ, Colman PM,  
491 Lawrence MC (2001) The Structure of the Fusion Glycoprotein of Newcastle Disease Virus  
492 Suggests a Novel Paradigm for the Molecular Mechanism of Membrane Fusion. *Structure*  
493 9:255–266. doi: 10.1016/S0969-2126(01)00581-0

494 da Silva AJ, Zangirolami TC, Novo-Mansur MTM, de Campos Giordano R, Martins EAL (2014)

- 495 Live bacterial vaccine vectors: An overview. Brazilian J Microbiol 45:1117–1129. doi:  
496 10.1590/s1517-83822014000400001
- 497 Ding C, Ma J, Dong Q, Liu Q (2018) Live bacterial vaccine vector and delivery strategies of  
498 heterologous antigen: A review. Immunol Lett 197:70–77. doi: 10.1016/j.imlet.2018.03.006
- 499 Ederer MM, Crawford RL, Herwig RP, Orser CS (1997) PCP degradation is mediated by closely  
500 related strains of the genus *Sphingomonas*. Mol Ecol 6:39–49. doi: 10.1046/j.1365-  
501 294X.1997.00151.x
- 502 Emanuelsson O, Brunak S, von Heijne G, Nielsen H (2007) Locating proteins in the cell using  
503 TargetP, SignalP and related tools. Nat Protoc 2:953–971. doi: 10.1038/nprot.2007.131
- 504 Fingerut E, Gutter B, Gallili G, Michael A, Pitcovski J (2003) A subunit vaccine against the  
505 adenovirus egg-drop syndrome using part of its fiber protein. Vaccine 21:2761–2766. doi:  
506 10.1016/S0264-410X(03)00117-8
- 507 Finn TM, Egan W (2018) Vaccine Additives and Manufacturing Residuals in Vaccines Licensed in  
508 the United States, Seventh Ed. Elsevier Inc.
- 509 Gatsos X, Perry AJ, Anwari K, Dolezal P, Wolyneć PP, Likić VA, Purcell AW, Buchanan SK,  
510 Lithgow T (2008) Protein secretion and outer membrane assembly in *Alphaproteobacteria*.  
511 FEMS Microbiol Rev 32:995–1009. doi: 10.1111/j.1574-6976.2008.00130.x
- 512 Goldenberg D, Lublin A, Rosenbluth E, Heller ED, Pitcovski J (2016) Optimized polypeptide for a  
513 subunit vaccine against avian reovirus. Vaccine 34:3178–3183. doi:  
514 10.1016/j.vaccine.2016.04.036
- 515 Green ER, Mecsas J (2016) Bacterial Secretion Systems – An overview CHAPTER SUMMARY.  
516 Microbiol Spectr 4:1–32. doi: 10.1128/microbiolspec.VMBF-0012-2015
- 517 Gu M, Liu W, Xu L, Cao Y, Yao C, Hu S, Liu X (2011) Positive selection in the hemagglutinin-  
518 neuraminidase gene of Newcastle disease virus and its effect on vaccine efficacy. Virol J 8:1–8.  
519 doi: 10.1186/1743-422X-8-150
- 520 Heaver SL, Johnson EL, Ley RE (2018) Sphingolipids in host–microbial interactions. Curr Opin  
521 Microbiol 43:92–99. doi: 10.1016/j.mib.2017.12.011
- 522 Huang Z, Panda A, Elankumaran S, Govindarajan D, Rockemann DD, Samal SK (2004) The  
523 Hemagglutinin-Neuraminidase Protein of Newcastle Disease Virus Determines Tropism and  
524 Virulence. J Virol 78:4176–4184. doi: 10.1128/jvi.78.8.4176-4184.2004
- 525 Iram N, Shah MS, Ismat F, Habib M, Iqbal M, Hasnain SS, Rahman M (2014) Heterologous  
526 expression, characterization and evaluation of the matrix protein from Newcastle disease virus  
527 as a target for antiviral therapies. Appl Microbiol Biotechnol 98:1691–1701. doi:  
528 10.1007/s00253-013-5043-2
- 529 Kaczmarczyk A, Vorholt J a, Francez-Charlot A (2013) Cumate-inducible gene expression system  
530 for *sphingomonads* and other *alphaproteobacteria*. Appl Environ Microbiol 79:6795–802. doi:  
531 10.1128/AEM.02296-13
- 532 Kaczmarczyk A, Vorholt JA, Francez-Charlot A (2014) Synthetic vanillate-regulated promoter for  
533 graded gene expression in *Sphingomonas*. Sci Rep 4:6453. doi: 10.1038/srep06453
- 534 Kawahara K, Kuraishi H, Zähringer U (1999) Chemical structure and function of glycosphingolipids  
535 of *Sphingomonas* spp and their distribution among members of the alpha-4 subclass of  
536 *Proteobacteria*. J Ind Microbiol Biotechnol 23:408–413. doi: 10.1038/sj/jim/2900708
- 537 Khow O, Suntrarachun S (2012) Strategies for production of active eukaryotic proteins in bacterial

538 expression system. Asian Pac J Trop Biomed 2:159–162. doi: 10.1016/S2221-1691(11)60213-  
539 X

540 Krziwon C, Zähringer U, Kawahara K, Weidemann B, Kusumoto S, Rietschel ET, Flad HD, Ulmer  
541 a J (1995) Glycosphingolipids from *Sphingomonas paucimobilis* induce monokine production  
542 in human mononuclear cells. Infect Immun 63:2899–905.

543 Lin Z, Pang S, Zhou Z, Wu X, Bhatt P, Chen S (2021) Current insights into the microbial degradation  
544 for butachlor: strains, metabolic pathways, and molecular mechanisms. Appl Microbiol  
545 Biotechnol 105:4369–4381. doi: 10.1007/s00253-021-11346-3

546 McAleer WJ, Buynak EB, Maigetter RZ, Wampler DE, Miller WJ, Hilleman MR (1984) Human  
547 hepatitis B vaccine from recombinant yeast. Nature 307:178–180.

548 Nagata Y, Ohtsubo Y, Endo R, Ichikawa N, Ankai A, Oguchi A, Fukui S, Fujita N, Tsuda M (2010)  
549 Complete genome sequence of the representative  $\gamma$ - hexachlorocyclohexane-degrading  
550 bacterium *Sphingobium japonicum* UT26. J Bacteriol 192:5852–5853. doi: 10.1128/JB.00961-  
551 10

552 Nallaiyan S, Abbadorai RSAJ, Sundaramoorthy S, Nelson J, Sanyasi SVV (2010) Production and  
553 application of recombinant haemagglutinin neuraminidase of Newcastle disease virus. Asian  
554 Pac J Trop Med 3:629–632. doi: 10.1016/S1995-7645(10)60152-6

555 Natale P, Brüser T, Driessen AJM (2008) Sec- and Tat-mediated protein secretion across the bacterial  
556 cytoplasmic membrane-Distinct translocases and mechanisms. Biochim Biophys Acta -  
557 Biomembr 1778:1735–1756. doi: 10.1016/j.bbamem.2007.07.015

558 Olsen I, Jantzen E (2001) Sphingolipids in Bacteria and Fungi. Anaerobe 7:103–112. doi:  
559 10.1006/anae.2001.0376

560 Petsch D, Anspach FB (2000) Endotoxin removal from protein solutions. J Biotechnol 76:97–119.  
561 doi: 10.1016/S0168-1656(99)00185-6

562 Pitcovski J, Fingerut E, Gallili G, Eliahu D, Finger A, Gutter B (2005) A subunit vaccine against  
563 hemorrhagic enteritis adenovirus. Vaccine 23:4697–4702. doi: 10.1016/j.vaccine.2005.03.049

564 Pitcovski J, Gutter B, Gallili G, Goldway M, Perelman B, Gross G, Krispel S, Barbakov M, Michael  
565 A (2003) Development and large-scale use of recombinant VP2 vaccine for the prevention of  
566 infectious bursal disease of chickens. Vaccine 21:4736–4743. doi: 10.1016/S0264-  
567 410X(03)00525-5

568 Prakash O, Lal R (2006) Description of *Sphingobium fuliginis* sp. nov., a phenanthrene-degrading  
569 bacterium from a fly ash dumping site, and reclassification of *Sphingomonas cloacae* as  
570 *Sphingobium cloacae* comb. nov. Int J Syst Evol Microbiol 56:2147–2152. doi:  
571 10.1099/ijs.0.64080-0

572 Rosano GL, Ceccarelli EA (2014) Recombinant protein expression in *Escherichia coli* : advances and  
573 challenges. 5:1–17. doi: 10.3389/fmicb.2014.00172

574 Saeed M, Babazadeh D, Naveed M, Alagawany M, Abd El-Hack ME, Arain MA, Tiwari R, Sachan  
575 S, Karthik K, Dhama K, Elnesr SS, Chao S (2019) In ovo delivery of various biological  
576 supplements, vaccines and drugs in poultry: current knowledge. J Sci Food Agric 99:3727–3739.  
577 doi: 10.1002/jsfa.9593

578 Sanchez L (2001) TCA protein precipitation protocol. October 2001–2001. doi:  
579 10.1145/2003653.2003657

580 Saunders NFW, Ng C, Raftery M, Guilhaus M, Goodchild A, Cavicchioli R (2006) Proteomic and  
581 Computational Analysis of Secreted Proteins with Type I Signal Peptides from the Antarctic

582 Archaeon *Methanococcoides b urtonii*. J Proteome Res 5:2457–2464. doi: 10.1021/pr060220x

583 Schmidt FR (2004) Recombinant expression systems in the pharmaceutical industry. 363–372. doi:  
584 10.1007/s00253-004-1656-9

585 Shahriari AG, Bagheri A, Bassami MR, Malekzadeh-Shafaroudi S, Afsharifar A, Niazi A (2016)  
586 Expression of Hemagglutinin–Neuraminidase and fusion epitopes of Newcastle Disease Virus  
587 in transgenic tobacco. Electron J Biotechnol 22:38–43. doi: 10.1016/j.ejbt.2016.05.003

588 Shahriari AG, Bagheri A, Bassami MR, Malekzadeh Shafaroudi S, Afsharifar AR (2015) Cloning  
589 and Expression of Fusion (F) and Haemagglutinin-neuraminidase (HN) Epitopes in Hairy Roots  
590 of Tobacco (*Nicotiana tabaccum*) as a Step Toward Developing a Candidate Recombinant  
591 Vaccine Against Newcastle Disease. J Cell Mol Res 7:11–18. doi: 10.14676/jcmr.v7i1.41621

592 Szatraj K, Szczepankowska AK, Chmielewska-Jeznach M (2017) Lactic acid bacteria - promising  
593 vaccine vectors: possibilities, limitations, doubts. J Appl Microbiol 123:325–339. doi:  
594 10.1111/jam.13446

595 Taylor J, Edbauer C, Rey-senelonge A, Bouquet J, Norton E, Goebel S, Desmettre P, PAOLETTI E  
596 (1990) Newcastle Disease Virus Fusion Protein Expressed in a Fowlpox Virus Recombinant  
597 Confers Protection in Chickens. J Virol 64:1441–1450. doi: 10.1007/s00586-009-0973-1

598 Van Den Ent F, Löwe J (2006) RF cloning: A restriction-free method for inserting target genes into  
599 plasmids. J Biochem Biophys Methods 67:67–74. doi: 10.1016/j.jbbm.2005.12.008

600 Yuan P, Paterson RG, Leser GP, Lamb RA, Jardetzky TS (2012) Structure of the Ulster Strain  
601 Newcastle Disease Virus Hemagglutinin-Neuraminidase Reveals Auto-Inhibitory Interactions  
602 Associated with Low Virulence. PLoS Pathog 8:e1002855. doi: 10.1371/journal.ppat.1002855

603 Zhang W, Lu J, Zhang S, Liu L, Pang X, Lv J (2018) Development an effective system to expression  
604 recombinant protein in *E . coli* via comparison and optimization of signal peptides : Expression  
605 of *Pseudomonas fluorescens* BJ 10 thermostable lipase as case study. Microb Cell Fact 1–12.  
606 doi: 10.1186/s12934-018-0894-y
